# Supplementary material
Source: HighWire-hosted journal article supplement (https://ard.bmj.com/content/annrheumdis-2019-216034)
Supplement: inline-supplementary-material-2 [file inline-supplementary-material-2.pdf]

**Suppl 2:** Characteristics of participants of the web-based surveys

| Variable                               | Result of <u>1<sup>st</sup> web based survey</u> (n=140)*+ | Result of <u>2<sup>nd</sup> web based survey</u> (n=120)#+ |
|----------------------------------------|------------------------------------------------------------|------------------------------------------------------------|
| Age, in years                          | -Patients 46.4 (13.8)<br>- Physicians 50.2 (12.8)          | -Patients 50.2 (14.2)<br>- Physicians 51.6 (11.1)          |
| Disease duration of patients, in years | 20.5 (15.2)<br>(n=42)                                      | 22.2 (16.8)<br>(n=29)                                      |
| Working as rheumatologist, in years    | 19.9 (14.5)                                                | 20.3 (11.5)                                                |

\*numbers represent 86 responses of physicians and 42 responses of patients, 12 participants did not provide demographics.

#numbers represent 86 responses of physicians and 29 responses of patients, 5 participants did not provide demographics.

+ results are given as mean (SD)
